# Supplementary material for: Properties of Ramie (Boehmeria nivea (L.) Gaudich) Fibers Impregnated with Non-Isocyanate Polyurethane Resins Derived from Lignin
Source: MDPI journal article supplement (doi:10.3390/ma16165704), 2023-08-20
Supplement: s1 [file s1]

---

# Supplementary Materials: Properties of Ramie (*Boehmeria nivea* (L.) Gaudich) Fibers Impregnated with Non-Isocyanate Polyurethane Resins Derived from Lignin

## Supplementary of Figures

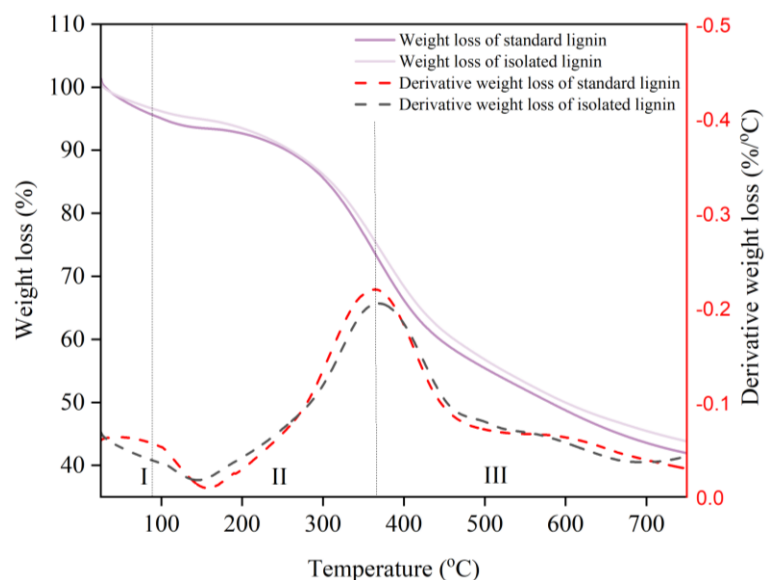

**Figure S1.** Thermal stability analysis of isolated lignin and standard lignin using TGA and DTG

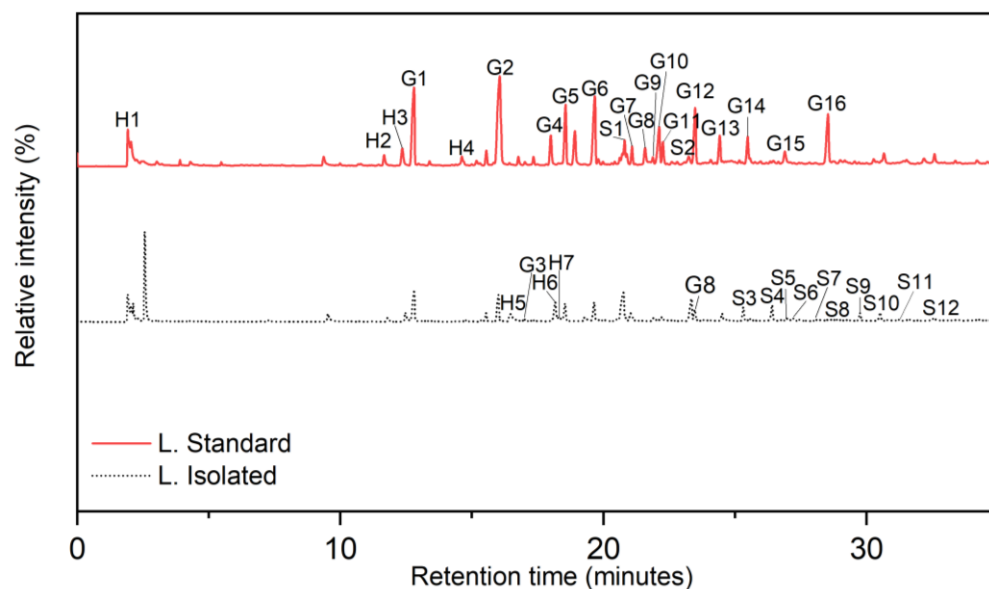

**Figure S2.** Py-GCMS chromatogram of l-isolated and l-standard.

---

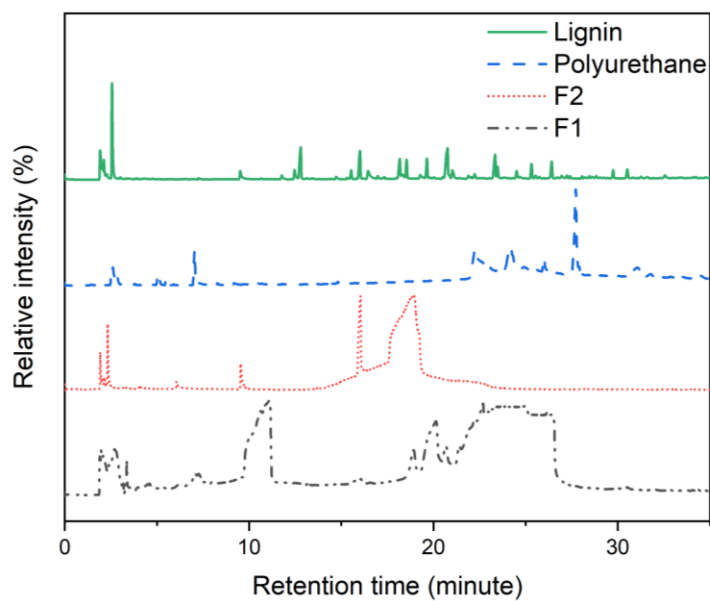

**Figure S3.** Py-GCMS chromatogram of lignin Bio-NIPU.

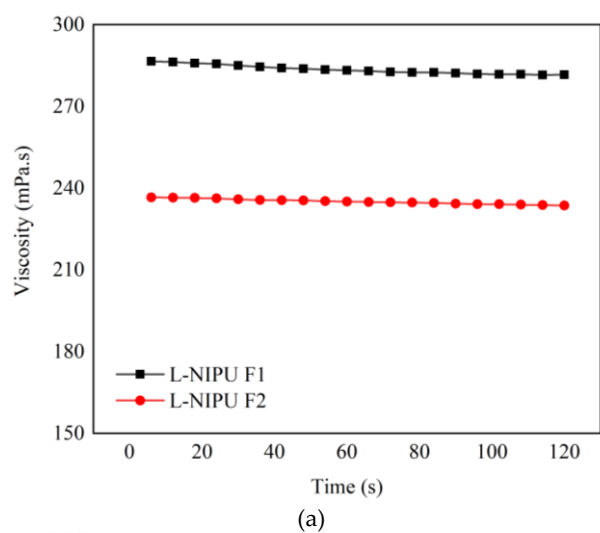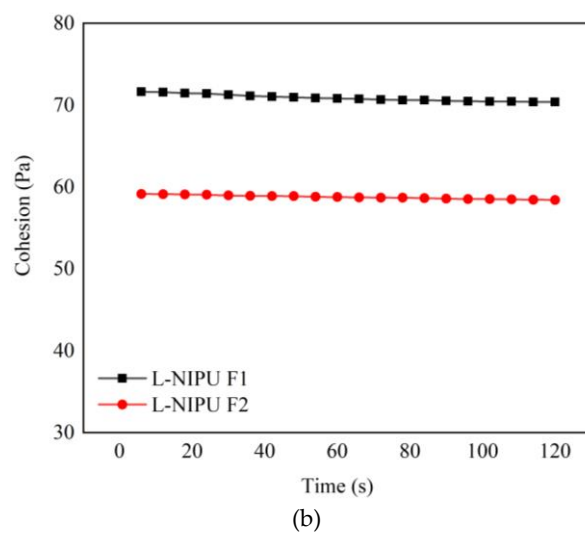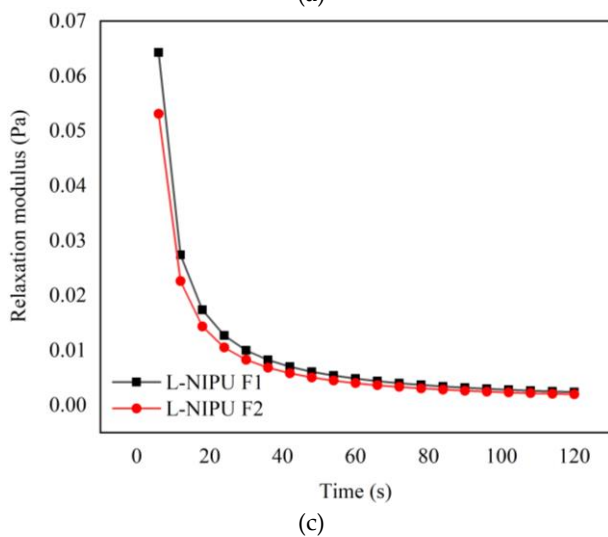

**Figure S4.** (a) Viscosity; (b) Cohesion; and (c) Relaxation modulus of lignin Bio-NIPU.

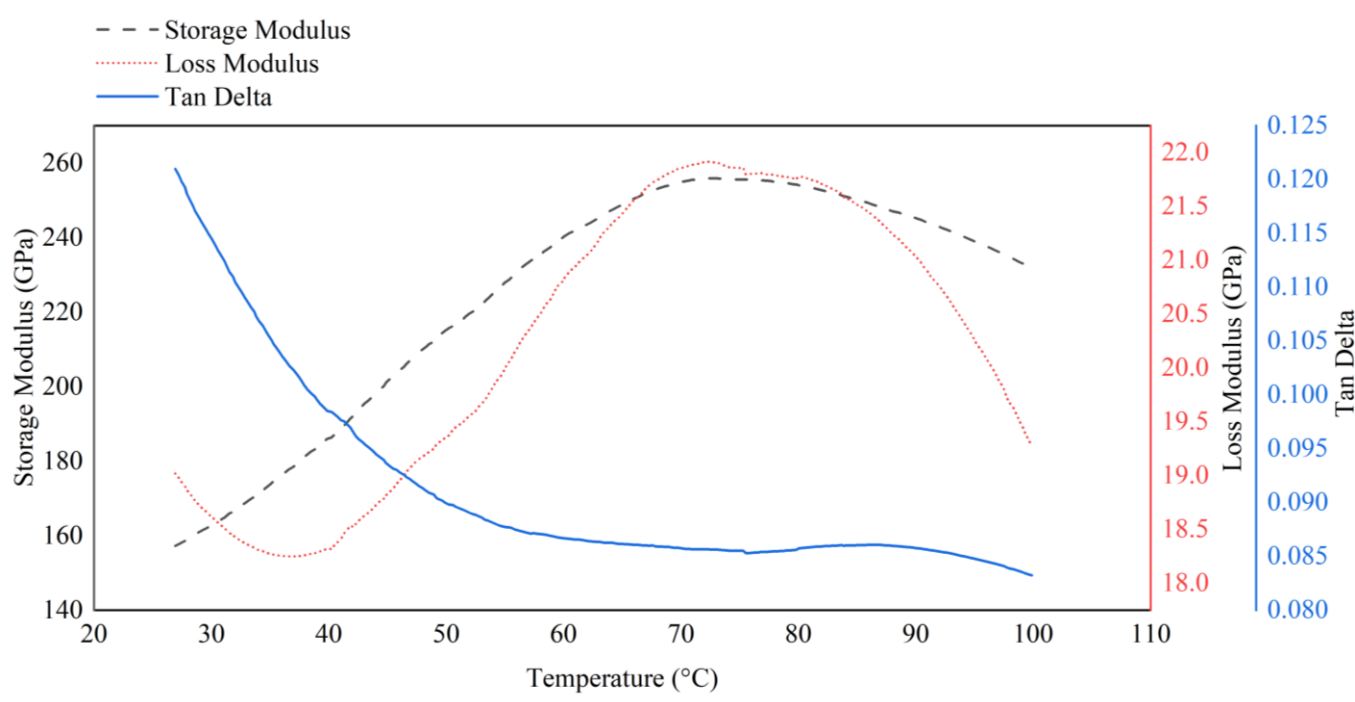

**Figure S5.** Thermo-mechanical analysis of lignin L-NIPU.

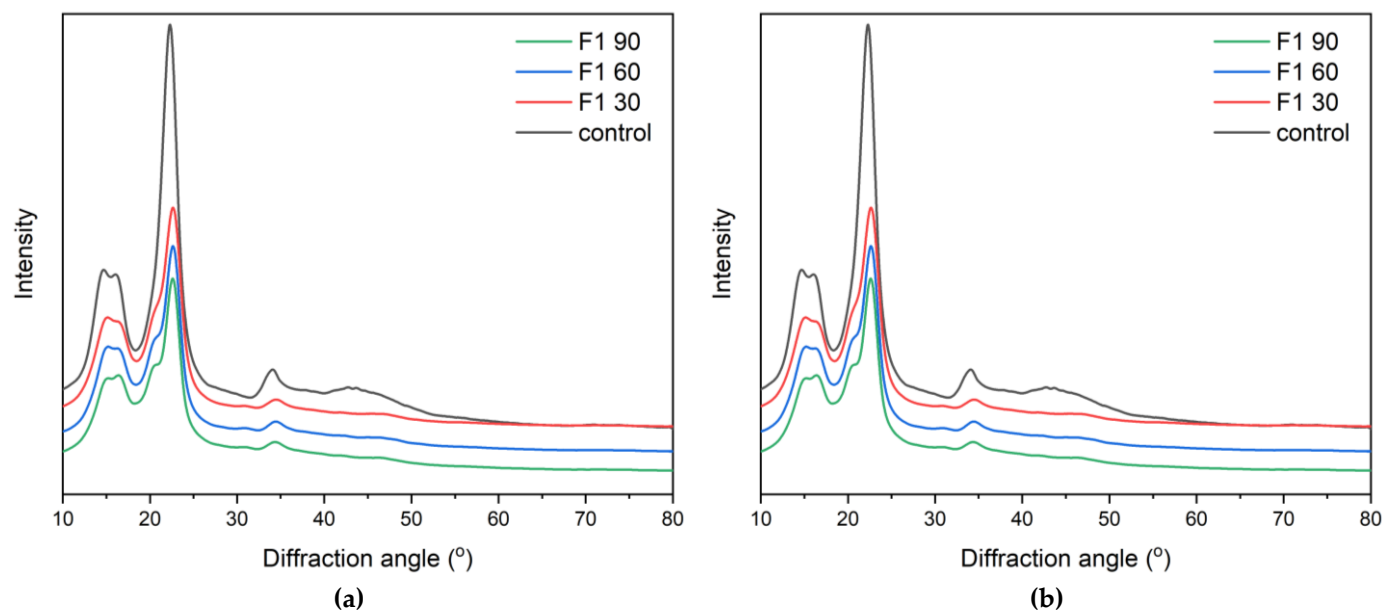

**Figure S6.** Crystallinity analysis by ramie fiber using XRD (a) Ramie impregnated with F1 lignin-based Bio-NIPU, and (b) Ramie impregnated with F2 lignin-based Bio-NIPU.

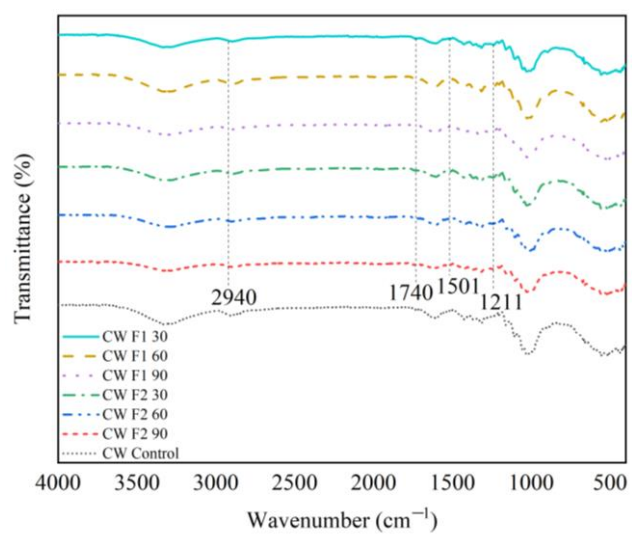

(a)

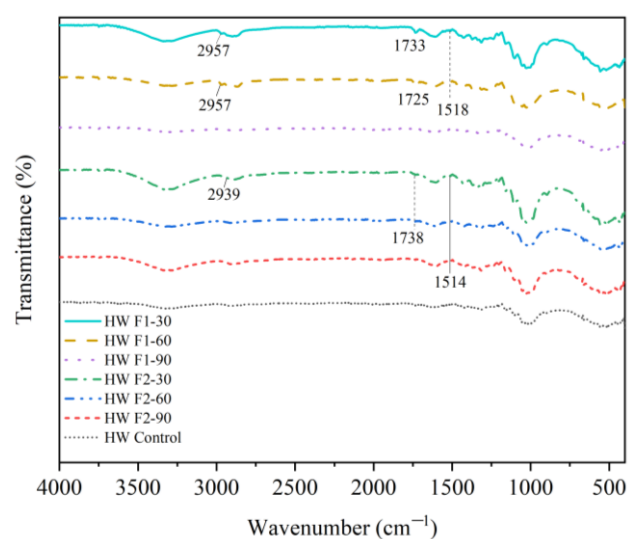

(b)

**Figure S7.** Changes in functional groups of impregnated ramie fiber treated by hydrolysis using (a) cold water and (b) after 60°C.
